# Supplementary material
Source: PubMed Central journal article supplement (PMC6743731)
Supplement: NIHMS1525206-supplement-1.pdf [file NIHMS1525206-supplement-1.pdf]

## Supporting Information

### The Effects of Omega-3 Fatty Acid Deficiency During Gestation on Oxidative Fatty Acid Degradation During Maturity in a Mouse Model of Alzheimer's Disease

Ran Furman and Paul H. Axelsen

Table S1. The tabulated data illustrated in figure 2a

Table S2. The tabulated data illustrated in figure 2b

Table S3. The tabulated data illustrated in figure 3

Table S4. The tabulated data illustrated in figure 4

Figure S1. Figure S1. Alternative representation of the distribution of ARA-derived radioactivity in the M fraction

**Table S1.** Numerical data for figure 2a. Values represent DHA concentrations mmoles/gm wet tissue.

|           | ARA |       |   | DHA |       |   |
|-----------|-----|-------|---|-----|-------|---|
|           | ave | s.e.m | n | ave | s.e.m | n |
| <b>NN</b> | 64  | 16    | 8 | 60  | 8     | 8 |
| <b>LN</b> | 59  | 7     | 7 | 48  | 4     | 7 |
| <b>LL</b> | 62  | 10    | 6 | 28  | 4     | 6 |

**Table S2.** Numerical data for figure 2b. Values represent the Western blot band intensities digitized with Image J software. Only the results within rows are quantitatively comparable, since they were run on the same gel.

|           | WT     |       |   | TG     |       |   | TG/WT |       |
|-----------|--------|-------|---|--------|-------|---|-------|-------|
|           | ave    | s.e.m | n | ave    | s.e.m | n | ratio | s.e.m |
| <b>NN</b> | 21,523 | 780   | 5 | 15,005 | 2,406 | 5 | 0.7   | 0.05  |
| <b>LN</b> | 12,790 | 1,355 | 7 | 13,098 | 3,047 | 5 | 1.1   | 0.10  |
| <b>LL</b> | 17,077 | 3,298 | 5 | 12,983 | 3,298 | 6 | 1.1   | 0.20  |

**Table S3.** Numerical data for figure 3. Values represent the percentage of total radioactivity in the Pr and Sp fractions of the BD<sub>MU</sub>, and the W and M fractions of the BD<sub>L</sub>, for 3 brain regions (Cb – cerebellum, Cx – cortex, and Hc – hippocampus), and the three diet groups.

| Pr |      |      |       |    |      |       |   |
|----|------|------|-------|----|------|-------|---|
|    | Diet | WT   |       |    | TG   |       |   |
|    |      | ave  | s.e.m | n  | ave  | s.e.m | n |
| Cb | NN   | 7.4  | 1.6   | 12 | 4.9  | 2.7   | 4 |
|    | LN   | 12.9 | 3.9   | 12 | 27.5 | 10.9  | 6 |
|    | LL   | 6.8  | 4.9   | 5  | 10.5 | 3.7   | 8 |
| Cx | NN   | 13.9 | 3.5   | 11 | 14.4 | 5.2   | 5 |
|    | LN   | 12.6 | 7.0   | 7  | 15.6 | 6.5   | 8 |
|    | LL   | 5.9  | 3.9   | 7  | 8.7  | 3.6   | 8 |
| Hc | NN   | 7.0  | 1.6   | 13 | 9.2  | 4.0   | 5 |
|    | LN   | 8.4  | 2.7   | 11 | 2.9  | 1.0   | 8 |
|    | LL   | 6.7  | 2.0   | 6  | 9.3  | 4.6   | 9 |
| Sp |      |      |       |    |      |       |   |
|    | Diet | WT   |       |    | TG   |       |   |
|    |      | ave  | s.e.m | n  | ave  | s.e.m | N |
| Cb | NN   | 18.4 | 4.3   | 12 | 21.5 | 5.4   | 4 |
|    | LN   | 34.8 | 7.1   | 12 | 23.3 | 4.9   | 6 |
|    | LL   | 34.2 | 7.4   | 5  | 35.1 | 8.5   | 8 |
| Cx | NN   | 25.9 | 6.9   | 11 | 29.8 | 3.4   | 5 |
|    | LN   | 34.0 | 9.4   | 7  | 25.8 | 8.4   | 8 |
|    | LL   | 26.5 | 6.8   | 7  | 21.2 | 5.7   | 8 |
| Hc | NN   | 21.5 | 5.0   | 13 | 42.0 | 13.1  | 5 |
|    | LN   | 33.7 | 6.6   | 11 | 28.9 | 7.3   | 8 |
|    | LL   | 18.4 | 3.9   | 6  | 19.0 | 3.2   | 9 |
| W  |      |      |       |    |      |       |   |
|    | Diet | WT   |       |    | TG   |       |   |
|    |      | ave  | s.e.m | n  | ave  | s.e.m | N |
| Cb | NN   | 10.8 | 3.9   | 12 | 7.9  | 2.8   | 4 |
|    | LN   | 7.3  | 1.3   | 12 | 8.6  | 2.7   | 6 |
|    | LL   | 6.5  | 1.7   | 5  | 4.8  | 1.4   | 8 |
| Cx | NN   | 12.7 | 3.6   | 12 | 4.3  | 1.3   | 5 |
|    | LN   | 5.1  | 1.4   | 7  | 5.4  | 1.3   | 8 |
|    | LL   | 6.5  | 1.6   | 7  | 8.5  | 2.9   | 8 |
| Hc | NN   | 7.6  | 1.5   | 13 | 1.8  | 0.8   | 5 |
|    | LN   | 9.3  | 1.7   | 11 | 6.7  | 1.2   | 8 |
|    | LL   | 6.1  | 1.3   | 6  | 10.3 | 2.0   | 9 |
| M  |      |      |       |    |      |       |   |
|    | Diet | WT   |       |    | TG   |       |   |
|    |      | ave  | s.e.m | n  | ave  | s.e.m | N |
| Cb | NN   | 63.5 | 4.9   | 12 | 65.0 | 3.9   | 4 |
|    | LN   | 47.2 | 7.2   | 12 | 50.9 | 10.7  | 6 |
|    | LL   | 52.6 | 10.7  | 5  | 48.4 | 9.9   | 8 |
| Cx | NN   | 51.0 | 7.0   | 11 | 51.5 | 7.9   | 5 |
|    | LN   | 51.8 | 10.3  | 7  | 53.1 | 8.6   | 8 |
|    | LL   | 61.2 | 5.9   | 7  | 61.8 | 8.3   | 8 |
| Hc | NN   | 64.0 | 4.8   | 13 | 47.1 | 13.6  | 4 |
|    | LN   | 49.3 | 6.3   | 11 | 61.5 | 6.5   | 8 |
|    | LL   | 68.7 | 3.8   | 6  | 61.6 | 2.9   | 9 |

**Table S4.** Numerical data for figure 4. Values represent the percentage of total radioactivity in each fraction.

| <b>Fraction I</b>   |             |            |              |          |            |              |          |
|---------------------|-------------|------------|--------------|----------|------------|--------------|----------|
|                     | <b>Diet</b> | <b>WT</b>  |              |          | <b>TG</b>  |              |          |
|                     |             | <b>ave</b> | <b>s.e.m</b> | <b>N</b> | <b>ave</b> | <b>s.e.m</b> | <b>n</b> |
| <b>Cb</b>           | NN          | 29.0       | 6.8          | 12       | 45.6       | 9.9          | 5        |
|                     | LN          | 27.0       | 8.3          | 9        | 7.0        | 3.0          | 7        |
|                     | LL          | 25.0       | 15.7         | 6        | 0.3        | 0.3          | 6        |
| <b>Cx</b>           | NN          | 28.9       | 5.5          | 9        | 54.3       | 3.8          | 5        |
|                     | LN          | 12.0       | 8.2          | 4        | 5.7        | 2.5          | 6        |
|                     | LL          | 0.2        | 0.1          | 5        | 2.9        | 1.5          | 7        |
| <b>Hc</b>           | NN          | 32.8       | 9.2          | 12       | 48.4       | 10.3         | 5        |
|                     | LN          | 1.5        | 1.3          | 7        | 6.4        | 3.8          | 7        |
|                     | LL          | 7.9        | 6.5          | 6        | 4.3        | 2.4          | 7        |
| <b>Fraction II</b>  |             |            |              |          |            |              |          |
|                     | <b>Diet</b> | <b>WT</b>  |              |          | <b>TG</b>  |              |          |
|                     |             | <b>ave</b> | <b>s.e.m</b> | <b>N</b> | <b>ave</b> | <b>s.e.m</b> | <b>N</b> |
| <b>Cb</b>           | NN          | 0.3        | 0.4          | 12       | 1.5        | 0.5          | 5        |
|                     | LN          | 0.4        | 0.4          | 9        | 1.0        | 1.0          | 7        |
|                     | LL          | 5.2        | 2.9          | 6        | 0.7        | 0.4          | 6        |
| <b>Cx</b>           | NN          | 1.3        | 0.6          | 9        | 1.8        | 1.0          | 5        |
|                     | LN          | 0          | 0            | 4        | 2.1        | 1.1          | 6        |
|                     | LL          | 2.6        | 1.4          | 5        | 0.55       | 0.5          | 7        |
| <b>Hc</b>           | NN          | 0.7        | 0.3          | 12       | 4.0        | 1.5          | 5        |
|                     | LN          | 0.1        | 0.1          | 7        | 6.9        | 4.7          | 7        |
|                     | LL          | 0.5        | 0.4          | 6        | 4.3        | 2.4          | 7        |
| <b>Fraction III</b> |             |            |              |          |            |              |          |
|                     | <b>Diet</b> | <b>WT</b>  |              |          | <b>TG</b>  |              |          |
|                     |             | <b>ave</b> | <b>s.e.m</b> | <b>N</b> | <b>ave</b> | <b>s.e.m</b> | <b>N</b> |
| <b>Cb</b>           | NN          | 0.4        | 0.2          | 12       | 0.4        | 0.3          | 5        |
|                     | LN          | 1.7        | 1.3          | 9        | 0.1        | 0.1          | 7        |
|                     | LL          | 0          | 0            | 6        | 0.2        | 0.2          | 6        |
| <b>Cx</b>           | NN          | 0.3        | 0.1          | 9        | 0.8        | 0.5          | 5        |
|                     | LN          | 0          | 0            | 4        | 0.9        | 0.4          | 6        |
|                     | LL          | 0.4        | 0.3          | 5        | 0.8        | 0.7          | 7        |
| <b>Hc</b>           | NN          | 0.1        | 0.1          | 12       | 0          | 0            | 5        |
|                     | LN          | 0          | 0            | 7        | 0.5        | 0.3          | 7        |
|                     | LL          | 0          | 0            | 6        | 2.7        | 2.4          | 7        |
| <b>Fraction IV</b>  |             |            |              |          |            |              |          |
|                     | <b>Diet</b> | <b>WT</b>  |              |          | <b>TG</b>  |              |          |
|                     |             | <b>ave</b> | <b>s.e.m</b> | <b>N</b> | <b>Ave</b> | <b>s.e.m</b> | <b>N</b> |
| <b>Cb</b>           | NN          | 0.7        | 0.4          | 12       | 0.8        | 0.7          | 5        |
|                     | LN          | 0.7        | 0.6          | 9        | 0.9        | 0.6          | 7        |
|                     | LL          | 0.6        | 0.5          | 6        | 0.1        | 0.1          | 6        |
| <b>Cx</b>           | NN          | 0.7        | 0.5          | 9        | 0.9        | 0.3          | 5        |
|                     | LN          | 0.9        | 0.9          | 4        | 4.3        | 1.7          | 6        |
|                     | LL          | 2.3        | 1.2          | 5        | 1.3        | 0.8          | 7        |
| <b>Hc</b>           | NN          | 1.3        | 0.8          | 12       | 1.6        | 0.8          | 5        |
|                     | LN          | 1.4        | 1.2          | 7        | 1.0        | 0.7          | 7        |
|                     | LL          | 1.0        | 0            | 6        | 0.8        | 0.5          | 7        |

Table S4 (continued)

| Fraction V  |      |      |       |    |      |       |   |
|-------------|------|------|-------|----|------|-------|---|
|             | Diet | WT   |       |    | TG   |       |   |
|             |      | ave  | s.e.m | n  | ave  | s.e.m | n |
| <b>Cb</b>   | NN   | 55.0 | 7.1   | 12 | 38.0 | 6.9   | 5 |
|             | LN   | 54.8 | 8.6   | 9  | 77.9 | 4.7   | 7 |
|             | LL   | 51.1 | 13.7  | 6  | 79.5 | 2.5   | 6 |
| <b>Cx</b>   | NN   | 57.7 | 7.0   | 9  | 33.0 | 3.2   | 5 |
|             | LN   | 64.6 | 14.3  | 4  | 70.4 | 5.1   | 6 |
|             | LL   | 81.0 | 3.8   | 5  | 75.7 | 3.5   | 7 |
| <b>Hc</b>   | NN   | 56.4 | 8.5   | 12 | 35.2 | 3.9   | 5 |
|             | LN   | 81.9 | 4.6   | 7  | 72.1 | 5.2   | 7 |
|             | LL   | 80.2 | 3.3   | 6  | 60.8 | 9.3   | 7 |
| Fraction VI |      |      |       |    |      |       |   |
|             | Diet | WT   |       |    | TG   |       |   |
|             |      | ave  | s.e.m | n  | Ave  | s.e.m | n |
| <b>Cb</b>   | NN   | 13.9 | 2.0   | 12 | 13.4 | 3.5   | 5 |
|             | LN   | 15.5 | 4.4   | 9  | 13.0 | 1.8   | 7 |
|             | LL   | 18.0 | 3.4   | 6  | 19.0 | 2.5   | 6 |
| <b>Cx</b>   | NN   | 11.1 | 2.1   | 9  | 8.7  | 2.7   | 5 |
|             | LN   | 22.4 | 6.0   | 4  | 16.4 | 2.0   | 6 |
|             | LL   | 13.5 | 4.2   | 5  | 18.7 | 3.3   | 7 |
| <b>Hc</b>   | NN   | 8.6  | 2.4   | 12 | 10.7 | 3.9   | 5 |
|             | LN   | 14.9 | 4.4   | 7  | 13.1 | 3.8   | 7 |
|             | LL   | 11.3 | 3.3   | 6  | 23.5 | 5.1   | 7 |

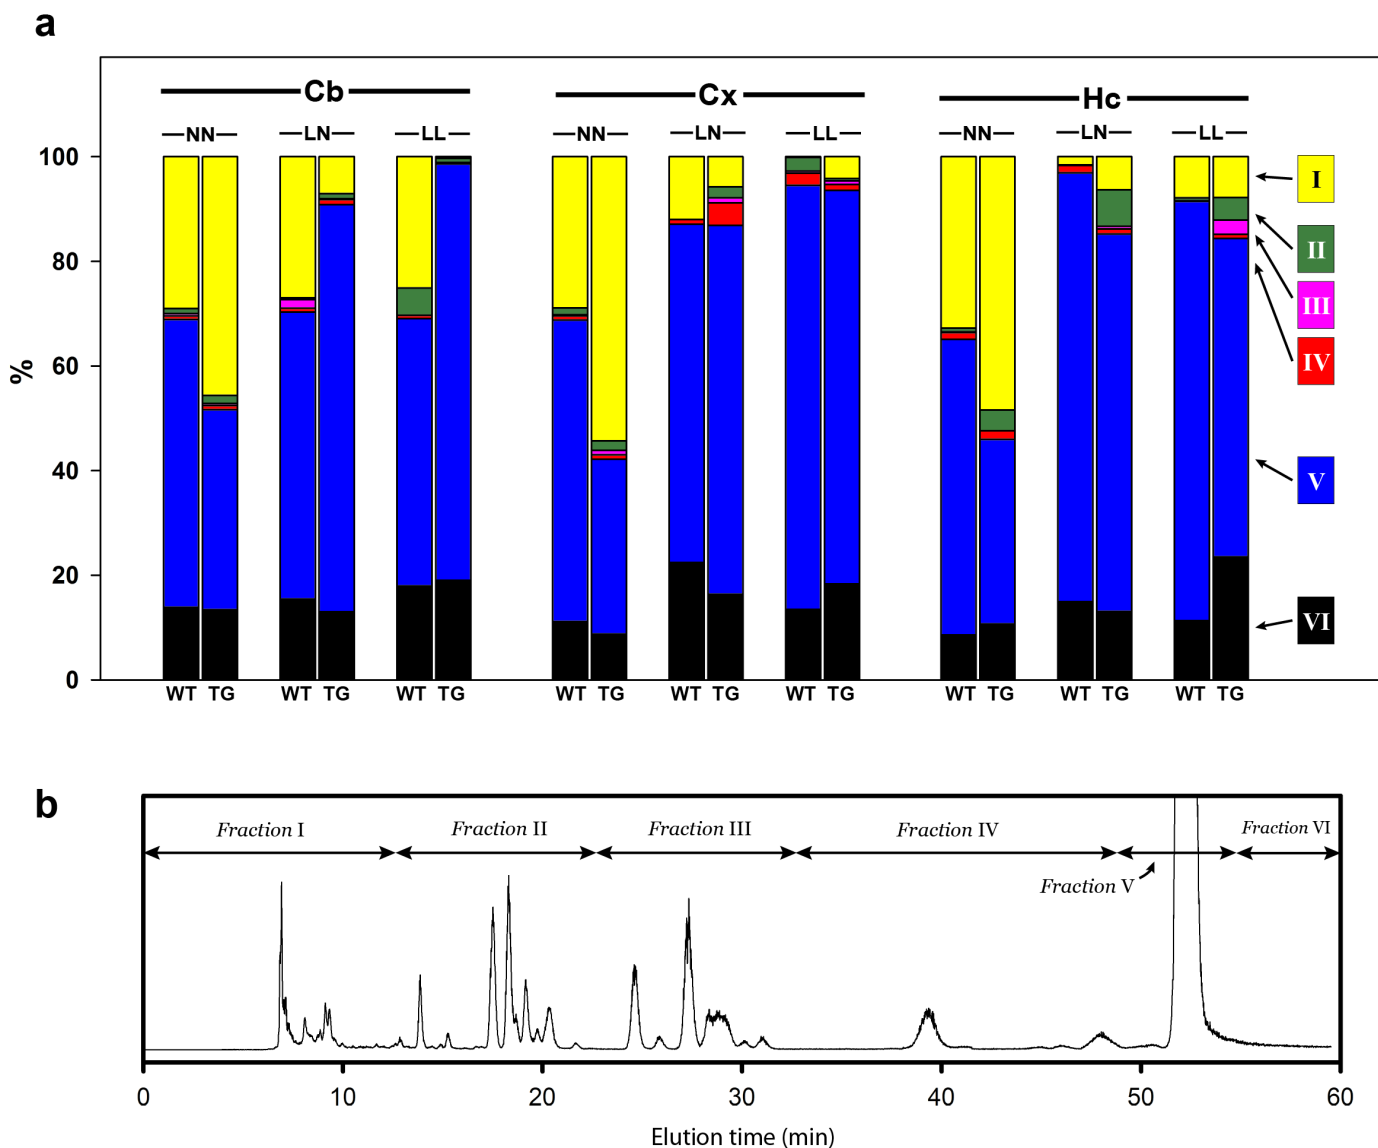

**Figure S1. Alternative representation of the distribution of ARA-derived radioactivity in the M fraction.** As in figure 4, M fractions were separated by HPLC into the 6 subfractions illustrated in figure 1. (A) The activity in each subfraction is expressed as a percentage of the total in all subfractions for each sample, and the overall height of each bar represents 100% of the activity. The component bars are ordered so that the most polar (earliest eluting) fraction I is on top, and the least polar (latest eluting) fraction VI is on the bottom. Unmodified ARA elutes in fraction V. (B) Total ion current chromatogram for a sample of the M fraction showing the intervals over which the six fractions were collected.
